# Supplementary material for: Weakened Contractile Performance and Mitochondrial Respiratory Complex Activity in Skeletal Muscle Improve during Interbout Arousal in Hibernating Daurian Ground Squirrel, Spermophilus dauricus
Source: MDPI journal article supplement (doi:10.3390/ijms242115785), 2023-10-30
Supplement: s1 [file s1]

Supplementary Figure S1

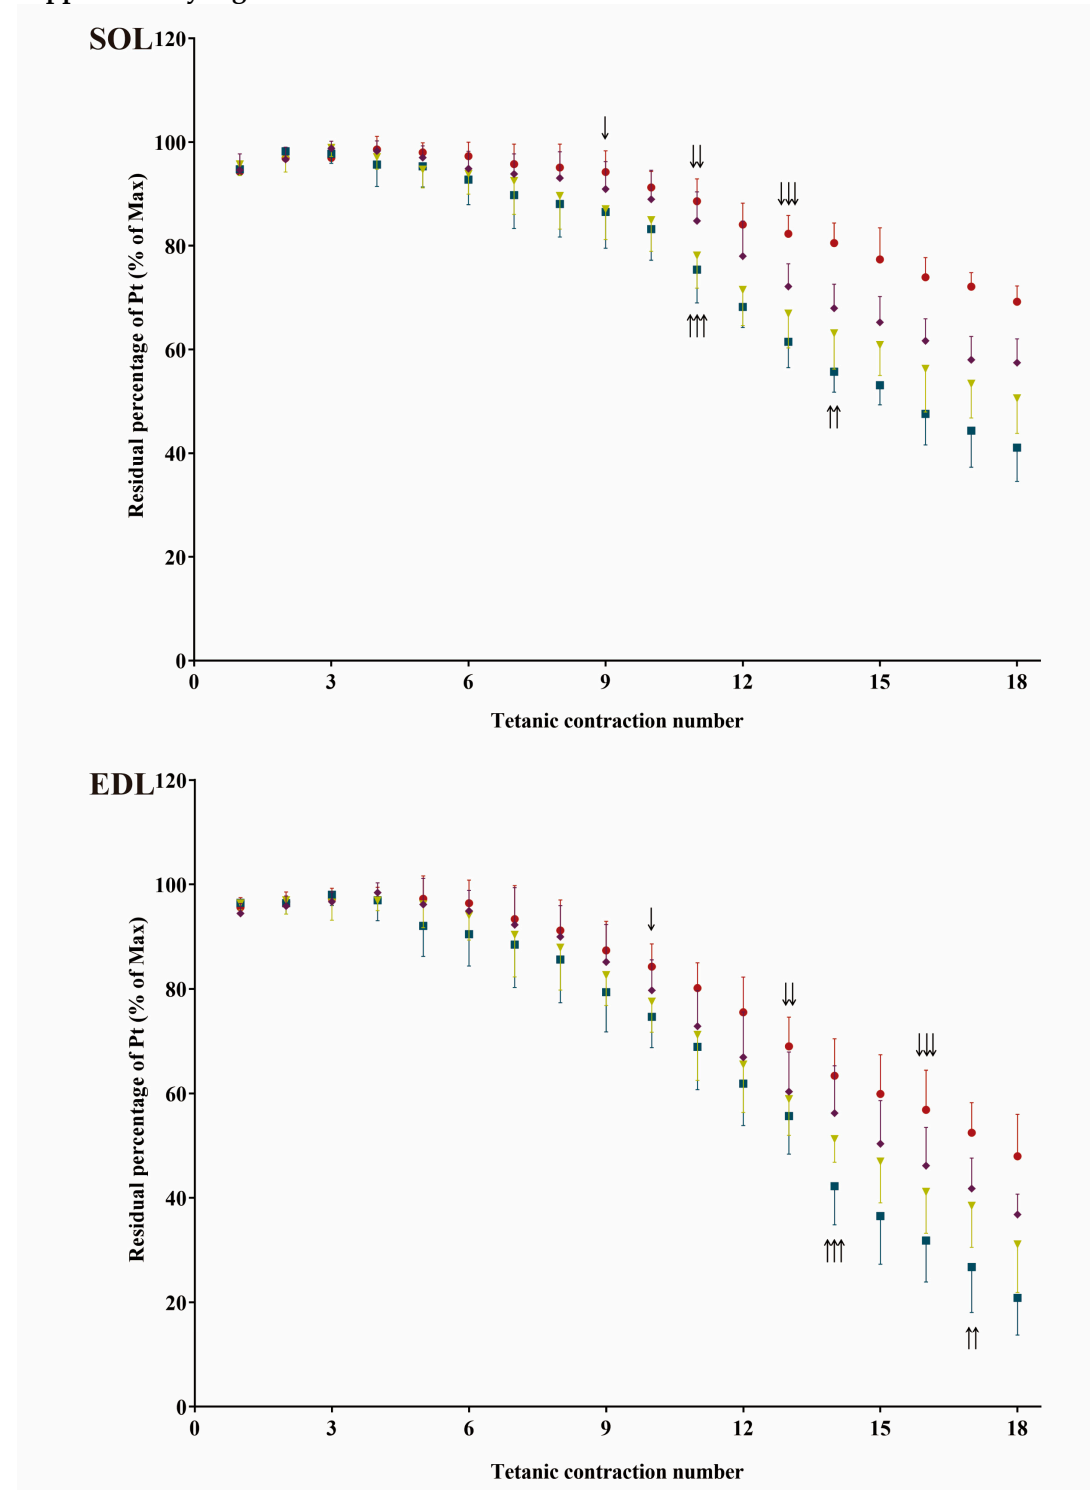

**Figure S1.** Changes in Pt during repetitive tetanic contractions for fatigability test among groups. Pt at each repetitive tetanic contraction was standardized as a percentage of the maximum Pt during repetitive tetanic contractions. Red: PRE group; Blue: TOR group; Green: IBA group; Purple: POST group.  $n = 5$ . One-way ANOVA and Fisher's LSD *post hoc* comparison were used to compare differences among groups at the same repetitive contraction number. Differences between TOR, IBA, and POST groups with PRE group first reaching significance ( $p < 0.05$ ) were indicated by "↓", "↓↓", and "↓↓↓", respectively. Differences between IBA and POST groups with TOR group first reaching significance ( $p < 0.05$ ) were indicated by "↑↑" and "↑↑↑", respectively.

**Supplementary Figure S2**

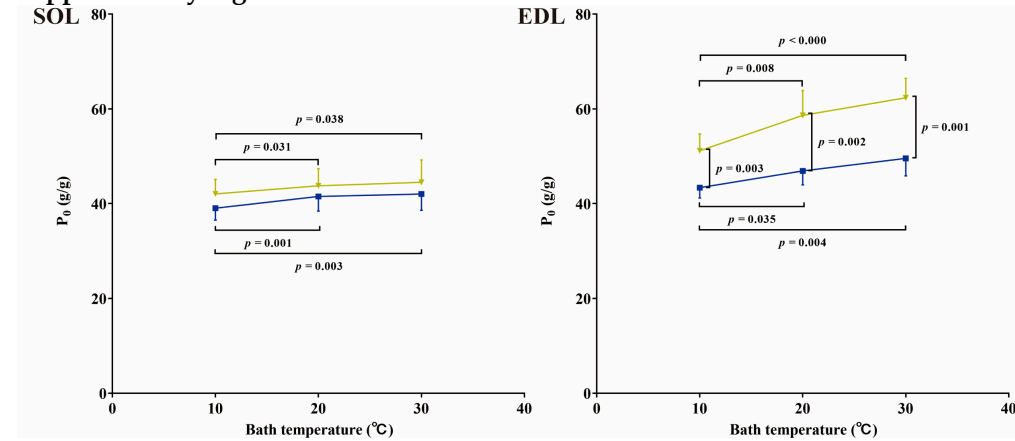

**Figure S2.** Changes in P<sub>0</sub> at various temperature points *in vitro* in TOR and IBA groups. Blue: TOR group; Green: IBA group.  $n = 5$ . Paired-samples  $t$ -test was used to compare differences between various temperature points within the same group, and independent-samples  $t$ -test was used to compare differences between TOR and IBA groups at the same temperature point.

**Supplementary Figure S3**

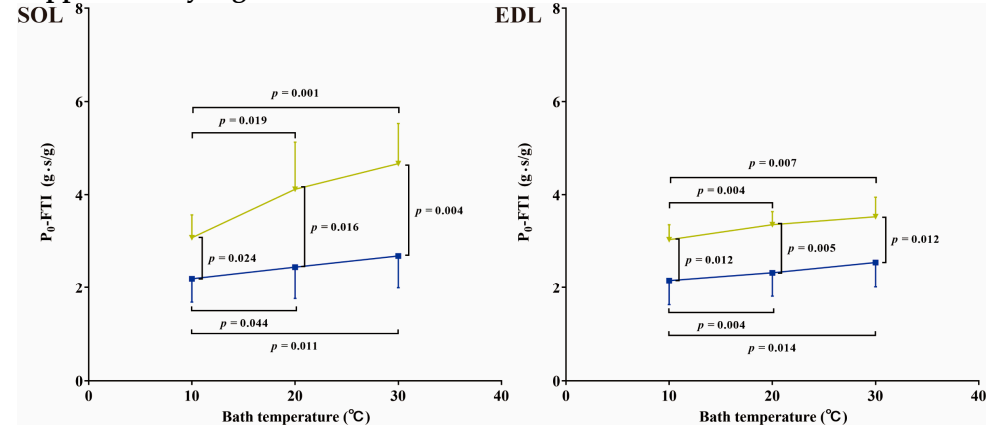

**Figure S3.** Changes in P<sub>0</sub>-FTI at various temperature points *in vitro* in TOR and IBA groups. Blue: TOR group; Green: IBA group.  $n = 5$ . Paired-samples  $t$ -test was used to compare differences between various temperature points within the same group, and independent-samples  $t$ -test was used to compare differences between TOR and IBA groups at the same temperature point.

**Supplementary Figure S4**

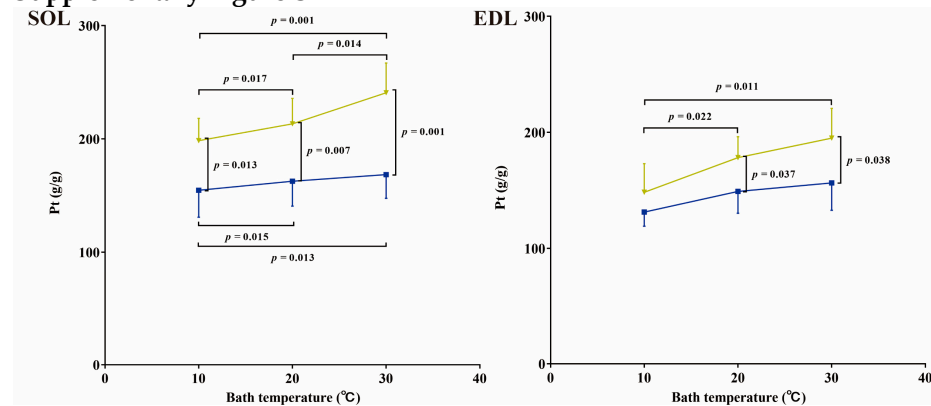

**Figure S4.** Changes in Pt at various temperature points *in vitro* in TOR and IBA groups. Blue: TOR group; Green: IBA group.  $n = 5$ . Paired-samples  $t$ -test was used to compare differences between various temperature points within the same group, and independent-samples  $t$ -test was used to compare differences between TOR and IBA groups at the same temperature point.
